# StarBEAST2 brings faster species tree inference and accurate estimates of substitution rates

Huw A. Ogilvie<sup>\*1,2</sup> and Alexei J. Drummond<sup>2,3</sup>

<sup>1</sup>Division of Evolution, Ecology and Genetics, Research School of Biology, Australian National  
University, Canberra, Australia

<sup>2</sup>Centre for Computational Evolution, University of Auckland, Auckland, New Zealand

<sup>3</sup>Department of Computer Science, University of Auckland, Auckland, New Zealand

August 18, 2016

---

\*huw.ogilvie@anu.edu.au

# Abstract

The multispecies coalescent (MSC) reconstructs species trees from a set of genes, and fully Bayesian MSC methods like \*BEAST estimate species trees from multiple sequence alignments. Today thousands of genes can be sequenced for a given study, but using that many genes with \*BEAST is intractably slow. One alternative is concatenation, which assumes that the evolutionary history of each gene tree is identical to the species tree. This is an inconsistent estimator of species tree topology, and a worse estimator of divergence times. Concatenation also induces spurious substitution rate variation when incomplete lineage sorting is present. Another alternative is to use summary MSC methods like ASTRAL, but such methods are also unsatisfactory because they infer branch lengths in coalescent units, and so cannot estimate divergence times. To enable fuller use of available data and more accurate inference of species tree topologies, divergence times, and substitution rates, we have developed a new version of \*BEAST called StarBEAST2. To improve convergence rates we add analytical integration of population sizes and novel MCMC operators which improved computational performance by  $3.1\times$  when analyzing a single empirical data set, and an average of  $6.2\times$  across 96 simulated data sets. Convergence rates are also more consistent between chains than \*BEAST. To enable accurate estimates of per-species substitution rates we introduce species tree relaxed clocks, and show that StarBEAST2 is a more powerful and robust estimator of rate variation than concatenation. StarBEAST2 is available through the BEAUTi package manager in BEAST 2.4 and above.

Keywords: Multispecies coalescent, concatenation, phylogenetic methods, incomplete lineage sorting, relaxed clocks, species trees.

# 1 Introduction

The throughput of sequencing technologies has improved many-fold over the past two decades culminating in next generation sequencing (NGS), and it is now feasible to sequence whole or partial genomes or transcriptomes for phylogenetic studies (Lemmon and Lemmon, 2013). NGS produces hundreds or thousands of phylogenetically useful loci (see for example Blom *et al.*, 2016) with potentially millions of sites spread across a data set of multiple sequence alignments.

While NGS offers hundreds or thousands of loci at relatively low cost, making accurate inferences from the enormous amount of data produced is particularly challenging. In the case of \*BEAST, a fully Bayesian method of species tree inference which implements a realistic and robust evolutionary model in the multispecies coalescent (MSC; Degnan and Rosenberg, 2009; Heled and Drummond, 2010), it becomes exponentially slower as the number of loci in an analysis is increased. This scaling behaviour causes \*BEAST to become intractably slow after a certain number of loci (the exact number will depend on other parameters of the data set, see Ogilvie *et al.*, 2016). Given the current challenges of using large phylogenomic data sets with \*BEAST there have been three broad alternatives available to researchers; concatenate sequences from multiple loci, use alternative MSC methods which are based on

summary statistics instead of sequence alignments, or choose a tractable subset of loci to use with a fully Bayesian method like \*BEAST, BEST (Liu, 2008), or BPP (Yang, 2015).

Using maximum likelihood phylogenetic methods to infer a species tree based on concatenated sequences will return the single tree that best fits the combined sequence alignment according to the phylogenetic likelihood function (Felsenstein, 1981). Popular maximum-likelihood concatenation methods include RAxML, PAML and PhyML (Stamatakis, 2014; Yang, 2007; Guindon *et al.*, 2010). Bayesian methods, such as ExaBayes and BEAST (Aberer *et al.*, 2014; Drummond and Rambaut, 2007), will instead return a distribution of trees which are probable given the combined sequence alignment, a set of priors, and the same likelihood function. Recent results show that likelihood-based concatenation can be counterproductive, producing statistically inconsistent results which assign high confidence to incorrect nodes due to model misspecification (Liu *et al.*, 2015). In the so-called “anomaly zone” of short branch lengths, the most probable gene tree topology will be different from the species tree, and estimated tree topologies will likely differ from the true species tree topologies (Degnan and Rosenberg, 2006; Kubatko and Degnan, 2007).

More recently identified problems with likelihood-based concatenation are systematic errors when estimating branch lengths, including overestimation of divergence times. Because some time is required for genes to coalesce looking backwards from a speciation event, the expected molecular distance between two species is greater than the true divergence time. This leads concatenation to overestimate the divergence times across a species tree in proportion to effective population size (Arbogast *et al.*, 2002). Such overestimation of

divergence times can result in dramatic inflation of estimated tip branch lengths (Ogilvie *et al.*, 2016).

Incomplete lineage sorting (ILS) also causes systematic errors in estimated branch lengths when using concatenation, because substitutions on a discordant gene tree branch which has no corresponding species tree branch must be explained by multiple substitutions on different species tree branches. Substitutions produced by ILS (SPILS) causes concatenation to overestimate the lengths of specific branches and underestimate the lengths of others, which produces apparent substitution rate variation where none exists (Mendes and Hahn, 2016). For all the above reasons, trees inferred using concatenation are therefore not a reliable approximation of the species tree in terms of branch lengths or topology.

As an alternative to concatenation, MSC methods which use summary statistics instead of sequence alignments have been developed for use with phylogenomic data. Popular summary methods include MP-EST and ASTRAL (Liu *et al.*, 2010; Mirarab *et al.*, 2014), but recent results show that MP-EST should be used with caution as it is sensitive to gene tree errors (Mirarab and Warnow, 2015; Xi *et al.*, 2015). At low levels of ILS, MP-EST is less accurate than likelihood-based or neighbor-joining concatenation at inferring topologies, and even at high levels of ILS it may be no more accurate than concatenation (Ogilvie *et al.*, 2016). While other summary methods like ASTRAL may be more reliable than MP-EST, these methods estimate branch lengths in coalescent units instead of substitutions. Molecular-clock informed divergence times therefore cannot be reconstructed using summary methods. If concatenation is used to estimate branch lengths or divergence times for a fixed species

tree topology estimated using a summary method, then those estimates will be unreliable for the same reasons as pure concatenation.

With the aim of improving the computational performance of fully Bayesian MSC inference of species trees, we have developed an upgrade to \*BEAST — StarBEAST2 — which is available as a package for BEAST 2 (Bouckaert *et al.*, 2014). By improving computational performance, StarBEAST2 should enable the use of more loci and thereby improve the precision of estimated parameters and provide an alternative to concatenation. We have also developed and include in StarBEAST2 new MSC relaxed clock models to enable accurate inference of per-species substitution rates.

## 2 New Approaches

### 2.1 Analytical integration of population sizes

Markov Chain Monte Carlo (MCMC) methods like \*BEAST jointly integrate over many parameters by proposing small changes at each step to eventually produce a probability distribution for all parameters. From a researcher’s perspective, some may be “nuisance” parameters not of scientific interest. For example species tree topology and divergence times may be of interest, but not effective population sizes. For tractable parameters, an analytic solution will integrate over the entire range of values at each MCMC step, and may be faster than MCMC integration. However explicit estimates will not be produced so this approach

is suitable only for nuisance parameters. Among-site rate variation is already integrated out at each step; the likelihood of each site is calculated for all possible discrete gamma rates at each step, so individual site rates are not estimated (Yang, 1994).

Analytical integration of constant per-branch population sizes was first implemented as part of BEST (Liu *et al.*, 2008). The analytic solution, which we have added to StarBEAST2, uses an inverse gamma conjugate prior for population sizes. By default StarBEAST2 fixes the shape of the distribution  $\alpha = 3$  and only estimates the mean of the distribution  $\mu$ , which is proportional to the scale parameter  $\beta$ :

$$\mu = \frac{\beta}{\alpha - 1} = \frac{\beta}{2} \quad (1)$$

In this special case where  $\alpha = 3$ , the standard deviation is identical to the mean:

$$\sigma = \sqrt{\frac{\beta^2}{(\alpha - 1)^2 \times (\alpha - 2)}} = \sqrt{\frac{\beta^2}{2^2}} = \frac{\beta}{2} = \mu \quad (2)$$

The coefficient of variation  $c_v = \sigma/\mu$  of the prior distribution for effective population sizes is therefore 1.

## 2.2 Coordinated tree topology changing operators

One approach to improving the performance of MSC analyses which simultaneously estimate gene and species trees (such as \*BEAST) is to develop MCMC operators which propose coordinated changes to both the species tree and the gene trees in the same step. Yang and Rannala (2014) introduced a Metropolis-Hastings (MH; Metropolis *et al.*, 1953; Hastings, 1970) operator which makes nearest-neighbor interchange (NNI) changes to the species tree topology, and simultaneously makes changes to gene tree topologies which preserve compatibility of the gene trees within the proposed species tree. Later, both Jones (2016) and Rannala and Yang (2015) introduced more general coordinated operators which make subtree prune and regraft (SPR) changes to the species tree. We have reimplemented these coordinated NNI and SPR moves in StarBEAST2 as a single new operator called “CoordinatedExchange”. Rannala and Yang (2015) also describe a proposal distribution which favours topological changes on shorter branches, and also less radical changes in topology. StarBEAST2 implements a simpler proposal distribution but still favours less radical changes by applying adjustable proposal probability weights to (less radical) NNI moves and (more radical) SPR moves.

## 2.3 Coordinated node height changing operators

A novel class of coordinated Metropolis operators was introduced by Jones (2016). These operators change the height of a non-root non-leaf species tree node, and the heights of “con-



nected components” of gene tree nodes, by an amount  $\epsilon$  chosen from a uniform distribution. The lower bound of the uniform distribution is the negative length of the shortest child branch of any connected component or of the species tree node, and the upper bound is the positive length of the shortest parent branch. As long as the connected components are chosen with reference only to the topology of the species tree, the topology of the gene trees, and the mapping of sampled individuals to species, operators of this class are symmetric (Jones, 2016).

We have developed a new operator called “CoordinatedUniform” that belongs to this class. Individuals from extant species which descend from a species tree node, or are directly descended from a gene tree node, are referred to as descendant individuals. The gene tree nodes selected by this operator to be shifted in height are those for which (1) at least one descendant individual is also a descendant individual of the left child of the selected species tree node, (2) the same but for the right child, and (3) all descendent individuals are also descendent individuals of the selected species tree node.

We have also developed a new adaptive MH (Andrieu and Thoms, 2008) operator called “CoordinatedExponential” which changes the height of the species tree root and the height of connected components of gene tree nodes by an amount  $\epsilon$ . Just as for CoordinatedUniform, the changed gene tree nodes are those for which at least one descendant individual is also a descendant individual for each child of the species tree root. Because the length of parent branches of the species tree root or connected components which include a gene tree root will be undefined, a different method must be used to choose  $\epsilon$  compared to CoordinatedUniform.

First the lower bound of the species tree root height is defined as the current height minus the length of the shortest child branch of any connected component or of the species tree root. The difference between the lower bound and the current root height is referred to as  $x$ , and a new random value  $x'$  is chosen from an exponential distribution. The value of  $x' - x$  is then used for  $\epsilon$ . The median of the exponential distribution is adaptively modified over the course of an MCMC chain to equal the posterior expectation of  $x$ .

Because the proposal distribution for a new species tree root height is independent of the current height, the Hastings ratio which is usually  $q(x',x)/q(x,x')$  (Hastings, 1970) can be simplified to  $\pi(x)/\pi(x')$ . The natural logarithm of the Hastings ratio may then be derived from the respective probability densities of  $x$  and  $x'$  drawn from an exponential distribution with the rate  $\lambda$ :

$$\frac{\pi(x)}{\pi(x')} = \frac{\lambda e^{-\lambda x}}{\lambda e^{-\lambda x'}} = \frac{e^{-\lambda x}}{e^{-\lambda x'}} \quad (3)$$

$$\therefore \ln \left( \frac{\pi(x)}{\pi(x')} \right) = \ln (e^{-\lambda x}) - \ln (e^{-\lambda x'}) \quad (4)$$

$$= \lambda x' \cdot \ln (e) - \lambda x \cdot \ln (e) \quad (5)$$

$$= \lambda (x' - x) = \lambda \epsilon \quad (6)$$

## 2.4 Species tree relaxed clocks

The overall rate of evolution occurring at a given locus within a species will be influenced by the nature of the particular gene and also by the natural history of the particular species. For a given gene, the average substitution rate may depend on the effects of selection such as the accelerated molecular evolution of sex-biased genes in *Arabidopsis thaliana* (Gossmann *et al.*, 2014), or on within-genome variation in mutation rate (Baer *et al.*, 2007). For a given species, the average substitution rate is correlated with a multitude of traits including metabolic rate, body size, and fecundity, although causal relationships are difficult to pin down (Bromham, 2011). Unsurprisingly in light of the above, empirical analysis has shown that two major factors contributing to rate variation among gene branches are the per-gene rate and the per-species rate (Rasmussen and Kellis, 2007).

Because variation is expected in the nature of different genes and species, and therefore variation is also expected in the average substitution rate of different genes and species, multispecies coalescent models should take both per-gene and per-species rate variation into account. \*BEAST can accommodate both types of rate variation using gene tree relaxed clock models (for examples see Berv and Prum, 2014; Lambert *et al.*, 2015). This involves estimating per-branch substitution rates separately for each branch of each gene tree. While gene tree relaxed clocks may accommodate variation in substitution rates between species, they do not produce estimates of species branch rates. To enable accurate inference of species branch rates, we have developed a new species tree relaxed clock model.

The challenge of applying a relaxed clock to the species tree is that phylogenetic likelihood calculations require branch rates for each branch of each gene tree. Our clock model computes those rates using the total expected number of substitutions  $\Sigma\mathbb{E}(S)$  accumulated by a gene branch through all containing species branches. Substitutions are expected to be accumulated at the mean clock rate of the gene tree  $c$ , for example 0.01 for hominoid primate mitochondrial DNA (Moritz *et al.*, 1987), multiplied by the lengths of time  $L$  spent traversing each species tree branch, multiplied by the rates  $R$  of the corresponding species tree branches (Table 1).

Table 1: Expected numbers of substitutions  $\Sigma\mathbb{E}(S)$  under a species tree relaxed clock

| Gene branch | Gene rate $c$ | Length within $L$ |     |     | Species rate $R$ |     |     | $\mathbb{E}(S) = c \cdot L \cdot R$ |        |        | $\Sigma\mathbb{E}(S)$ |
|-------------|---------------|-------------------|-----|-----|------------------|-----|-----|-------------------------------------|--------|--------|-----------------------|
|             |               | A                 | B   | AB  | A                | B   | AB  | A                                   | B      | AB     |                       |
| a           | 0.01          | 1.0               | 0.0 | 0.5 | 0.7              | 1.0 | 1.3 | 0.0070                              | 0.0000 | 0.0065 | 0.0135                |
| b           |               | 0.0               | 1.0 | 0.5 |                  |     |     | 0.0000                              | 0.0100 | 0.0065 | 0.0165                |

The gene tree branch rates  $r$  can then be derived by dividing the total expected number of substitutions by the total length of that branch  $l$ . The gene tree branch rates for the illustrated example (Figure 1; Table 1) are therefore:

$$r_a = \frac{\Sigma\mathbb{E}(S_a)}{l_a} = \frac{0.0135}{1.5} = 0.009 \quad (7)$$

$$r_b = \frac{\Sigma\mathbb{E}(S_b)}{l_b} = \frac{0.0165}{1.5} = 0.011 \quad (8)$$

The new species tree relaxed clock model is available in StarBEAST2. Branch rate models

that can be used with a species tree relaxed clock currently include the well-established uncorrelated log-normal (UCLN) and uncorrelated exponential (UCED) models (Drummond *et al.*, 2006), as well as the newer random local clock model (Drummond and Suchard, 2010).

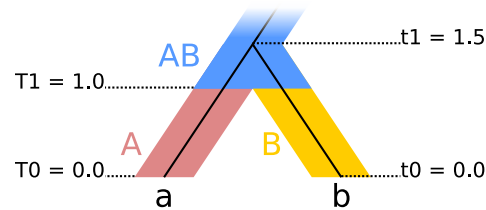

Figure 1: Two-species phylogeny used to illustrate species tree relaxed clocks. There are two extant species “A” and “B”, and one ancestral species “AB”. Within the species tree there is a single gene tree with extant individuals “a” and “b”. The single speciation event occurs at time  $T1$ , and the single coalescence event occurs at time  $t1$ .

## 3 Results

### 3.1 StarBEAST2 correctly implements the multispecies coalescent

New methods must be shown to be correct implementations of the target model. One way to accomplish this for MCMC methods is to estimate parameters from a prior distribution using the MCMC kernel, and to also draw independent samples from the same distribution by simulation. The resulting parameter distributions should be identical if the implementation is correct. We used this method to test the correctness of the novel features in StarBEAST2; analytical population size integration, coordinated operators, and species tree relaxed clocks. Simulated and StarBEAST2 distributions were identical for species and gene tree topologies (Figure S1,S2), species and gene tree node heights (Figure S3,S4), and for

gene tree branch rates (Figure S5,S6). This combination of results supports the correctness of the StarBEAST2 implementation.

### 3.2 *Pseudacris* chorus frogs have intermediate coalescent branch lengths

To characterize the performance of coordinated operators, methods of population size integration and relaxed clocks, we tested StarBEAST2 using real sequence data. The data set used for this analysis is from the North American chorus frog genus *Pseudacris*, and was originally collected and analyzed by Barrow *et al.* (2014). A key metric of phylogenies that can be used to judge whether it is necessary to employ MSC models is the average branch length in coalescent units  $\tau/2N_e$ . Given short branch lengths, likelihood-based or neighbor-joining concatenation is unable to infer accurate species trees regardless of the number of loci used, but for long branch lengths, concatenation is approximately as accurate as \*BEAST (Ogilvie *et al.*, 2016). Using StarBEAST2, the average branch length within this genus was determined to be  $3.22\tau/2N_e$ . This is an intermediate average length compared to the shallow simulations analyzed by Ogilvie *et al.* (2016) which had a shorter average length of  $0.54\tau/2N_e$ .

### 3.3 Coordinated height changing operators and analytical integration improve performance

To determine which configuration of new features would achieve the best performance, we ran StarBEAST2 using different combinations of operators, methods of population size integration and different relaxed clocks. To measure convergence both effective sample size (ESS) per hour and ESS per million states were computed for each independent chain. ESS per hour can be used to calculate the total time required for a converged chain (nominally where ESS equals or exceeds 200), and reflects how effectively operators explore the space of trees and parameters, as well as the computational time required by each operator proposal and likelihood calculation. In contrast, ESS per million states reflects only the exploration of tree and parameter space independently of calculation times. A variety of statistics were recorded for each analysis (Table S1-S4), and for each replicate the statistic with the slowest ESS rate for that particular chain was used when computing the mean and standard deviation of ESS per hour and per million states.

Multiple linear regressions with log transformed ESS rates as the response variables were used to measure the effect of coordinated topology changing operators, coordinated node height changing operators, and the method of population size integration. Each additional feature was treated as a binary indicator variable so that we could quantify the relative performance as a percentage by exponentiating the coefficient for each addition (Table 2). An interaction term for height changing operators and population size integration was included

because visualization of ESS rates (Figure 2) suggested such an interaction existed.

Table 2: Relative performance of operators, population size integration and clock models applied to *Pseudacris* reanalyses.

| Relaxed clock | ESS rate per   | Topology | H(eight) | A(nalytical) | H $\times$ A |
|---------------|----------------|----------|----------|--------------|--------------|
| Gene trees    | hour           | 83%***   | 247%***  | 107%         | 131%**       |
| Gene trees    | million states | 101%     | 278%***  | 110%         | 130%*        |
| Species tree  | hour           | 91%      | 753%***  | 110%         | 124%*        |
| Species tree  | million states | 106%     | 805%***  | 113%         | 124%*        |

\*:  $p < 0.05$ , \*\*:  $p < 0.01$ , \*\*\*:  $p < 0.001$ .

Coordinated topology operators had a significantly negative effect on ESS per hour of gene tree relaxed clock analyses, but no significant effect on ESS per million states (Table 2), suggesting that coordinated topology operators are no more effective than naïve operators at proposing new states. A decrease in the number of states per hour (Figure S8) shows that they are more computationally expensive than naïve operators, and explains the negative effect on ESS per hour.

For gene tree and species tree relaxed clock analyses, convergence rates using coordinated height changing operators were 2.47 times and 7.53 times as fast respectively than without those operators (Table 2). The difference made to species tree relaxed clock performance suggests that coordinated height changing operators are necessary for practical implementations of that model (Figure 2).

Species tree relaxed clocks with coordinated height changing operators were faster in terms of ESS per million states than gene tree relaxed clocks (Figure S7), showing that new state proposals are more effective. However changing a species tree branch rate requires updating the phylogenetic likelihood for all gene trees so the computational cost is much



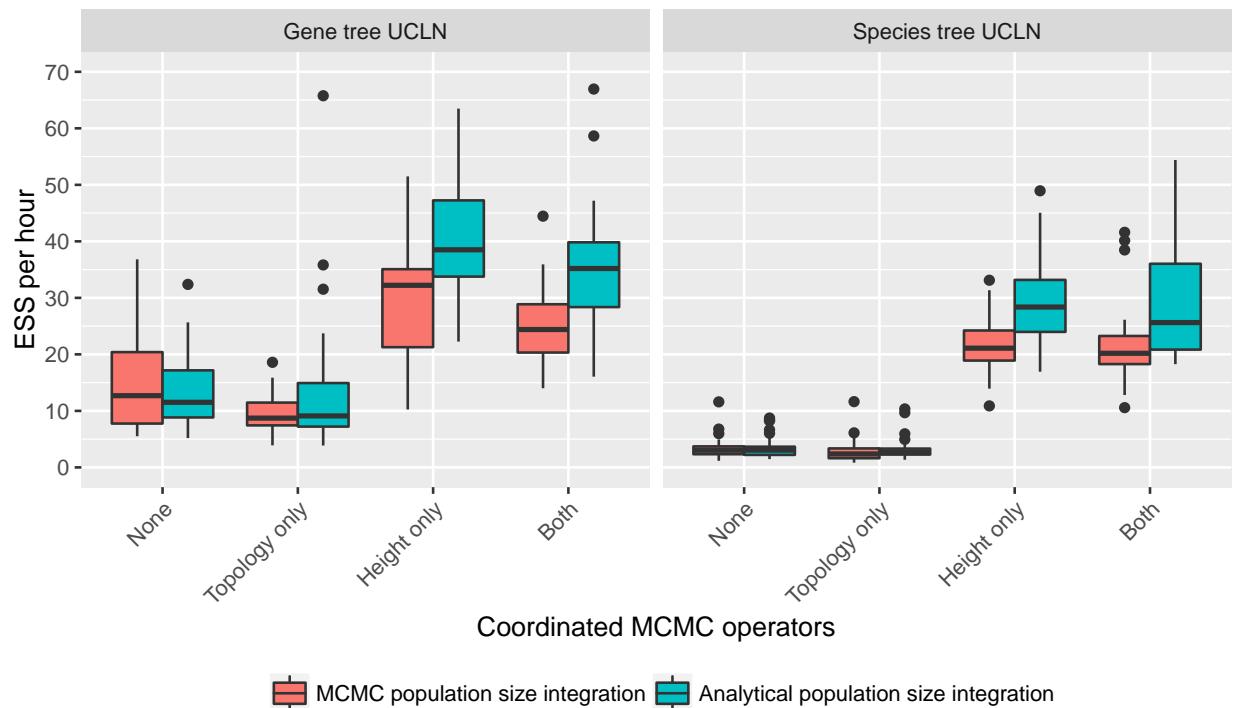

Figure 2: Impact of operators, population size integration and clock models on convergence of *Pseudacris* reanalyses. The estimated sample size (ESS) per hour for a given replicate used the smallest ESS out of all recorded statistics. Topology refers to the replacement of naïve nearest-neighbor interchange and subtree prune and regraft operators with coordinated operators. Height refers to the addition of operators which make coordinated changes to node heights. Uncorrelated log-normal (UCLN) relaxed clocks were applied to either each gene tree or to the species tree.  $N = 32$ .

higher than for gene tree relaxed clocks (Figure S8), so species tree relaxed clocks are still moderately slower than gene tree relaxed clocks in terms of ESS per hour (Figure 2).

In the absence of coordinated height changing operators, analytical population size integration had no significant effect on performance under any circumstance. However when combined with those operators, significant increases to ESS per hour and ESS per million states were observed for both gene tree and species tree relaxed clock analyses (Table 2).

### 3.4 Species tree relaxed clocks prevent SPILS

When using concatenation to infer a species tree, SPILS causes apparent substitution rate variation among predictable species tree branches. However in an ultrametric (time tree) framework like BEAST, branch lengths are constrained so that terminal species begin at time zero. We hypothesized that if a relaxed clock is used with concatenation in an ultrametric framework, SPILS will be absorbed as faster substitution rates for lineages that would be lengthened by SPILS in a non-ultrametric framework.

In an ultrametric framework with a strict clock and no external (e.g. fossil, biogeographical or known clock rate) calibrations, the substitution rate of each branch is set to 1. This ensures that 1 unit of time is equivalent to 1 expected substitution. Using a relaxed clock with no external calibrations the substitution rate of each branch can vary, but the expectation of the mean rate of all branches is 1, preserving the relationship of 1 unit of time = 1 expected substitution. Therefore when SPILS causes the rates of some branches to be faster than 1, the rates of other branches will be slower than 1 to keep the expected mean constant.

We used BEAST concatenation and StarBEAST2 with a species tree relaxed clock to infer the branch lengths and substitution rates of simulated species trees with the topology (((A,B),C),D),E), using sequence alignments simulated using a strict clock. Gene tree discordance will increase the estimated length of A, B and C branches for these species trees (Mendes and Hahn, 2016), and as hypothesized substitution rates for A and B branches inferred using concatenation were biased towards being faster than the true rate of 1 (Fig-

ure 3). Estimated substitution rates for the C branch were more variable, and could be faster or slower than 1. Substitution rates estimated for the D and E branches were biased towards being slower than 1, presumably to balance the mean rate. Concatenation also overestimated the lengths of tip branches, another known bias when using concatenation to infer a species tree (Ogilvie *et al.*, 2016). No biases were observed for the branch rates or lengths estimated using StarBEAST2 (Figure 3).

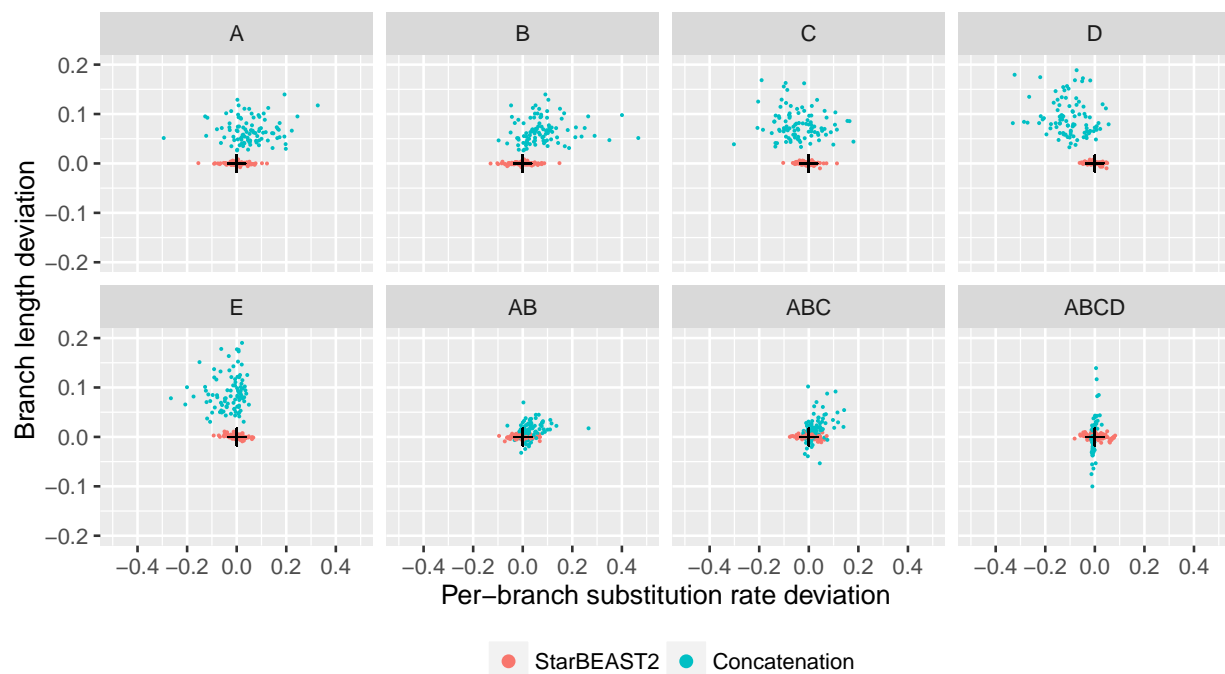

Figure 3: Accuracy of branch substitution rates and lengths inferred by BEAST concatenation and StarBEAST2. Deviation is the difference of each estimated rate and length from the true value. Estimated rates and lengths are the posterior expectation of the overall substitution rate and length for each species tree branch. Black crosses in each panel indicate the point of perfect accuracy. Each panel shows the distributions for the labelled extant or ancestral branch.  $N = 96$ .

A number of estimated branch rates had 95% credible intervals that excluded the true rate of 1 when using concatenation. If a study is testing whether substitution rates vary

across a species tree, those branch rates could be erroneously interpreted as faster or slower than average. In our simulations, the clock rate of the D branch would be inferred as slower than average in 37 out of 96 replicates (Figure S9), despite the sequence data being simulated using a strict clock. When applying the same 95% credible intervals to branch lengths, the true simulated length was excluded with just two exceptions for all tip branches across all replicates using concatenation (Figure S10). In contrast, no erroneous results would be inferred for branch rates given the same data using StarBEAST2, and out of the 768 total simulated non-root branch lengths, only five erroneous results would be inferred (Figure S9,S10).

### 3.5 StarBEAST2 is several times faster than \*BEAST

Our reanalysis of *Pseudacris* sequence data shows that coordinated height changing operators, and analytical integration of population sizes when combined with those operators, improve convergence. To show that this increased performance is generally applicable, and to demonstrate that StarBEAST2 can accurately reconstruct species trees, we needed to apply StarBEAST2 to simulated data sets for which the true species trees are known. To accomplish this we simulated 96 species trees of 19 taxa each under a birth-death model with log-normally distributed branch rates. Gene trees evolving within each species tree were simulated according to the MSC model with log-normally distributed mean clock rates. Finally, sequences were simulated according to an HKY process for each gene (Hasegawa *et al.*, 1985; Goldman, 1993). The parameters used for these simulations were chosen to pro-

duce intermediate branch lengths in coalescent units; the average simulated branch length was  $3.22\tau/2N_e$ , the same as for *Pseudacris* to two decimal places.

Simulated data was analyzed using concatenation with BEAST and using the MSC with StarBEAST2 with \*BEAST settings, high performance settings with gene tree relaxed clocks, and high performance settings with species tree relaxed clocks. \*BEAST settings matched the configuration of \*BEAST before StarBEAST2; explicit MCMC integration of population sizes, no coordinated operators, naïve NNI and SPR topology operators, and a UCLN relaxed clock applied to each gene tree. High performance settings included analytical integration of population sizes, coordinated height changing operators, and naïve NNI and SPR topology operators. Again multiple statistics were recorded to compute the ESS rate means and standard deviations (Table S5-S8).

Our simulation study confirmed that StarBEAST2 is several times faster than \*BEAST (Figure 4). For simulated data the average log convergence rate of StarBEAST2 with high performance settings and gene tree relaxed clocks was  $4.01 \ln(ESS/hour)$ . This compares to 2.18 using \*BEAST settings, an increase in performance of  $\exp(4.01 - 2.18) = 6.2$  times (Table S5). However for *Pseudacris* reanalyses the average was 3.66 for StarBEAST2 compared to 2.52 for \*BEAST, a smaller increase of 3.1 times (Table S1).

Species tree relaxed clocks were slower than the gene tree relaxed clocks when using high performance settings (Figure 4). The average log rate for simulated data when using a species tree relaxed clock with high performance settings was 3.74, which is still 4.8 times

faster than using gene tree relaxed clocks with \*BEAST settings (Table S5). Again the difference was smaller for *Pseudacris* reanalyses, with a rate of 3.36 for StarBEAST2, or 2.3 times faster (Table S1).

The computational performance of StarBEAST2 was also more consistent than \*BEAST. The standard deviations of the log rate using StarBEAST2 to analyze simulated data sets were 0.44 and 0.46 for gene and species tree relaxed clocks respectively, compared to 0.73 for \*BEAST (Table S7). The standard deviations when reanalyzing *Pseudacris* were 0.23, 0.26 and 0.55 for StarBEAST2 with gene tree relaxed clocks, StarBEAST2 with species tree relaxed clocks, and \*BEAST respectively. The higher spread for simulated data reflects the fact that each replicate used a different species tree with different genes and sequence alignments.

Concatenation with the same number of loci is much faster than StarBEAST2, but concatenation using 220 loci was similar to \*BEAST and slower than StarBEAST2 (Figure 4).

### 3.6 Concatenation is a worse estimator of branch lengths than topology

The accuracy of StarBEAST2 relative to BEAST concatenation varied depending on the type of error and whether equal numbers of loci were used. Relative species tree error measures the accuracy of estimated branch lengths; by that measure StarBEAST2 using 22 loci outperformed concatenation using 22 loci, and matched the performance of concatenation

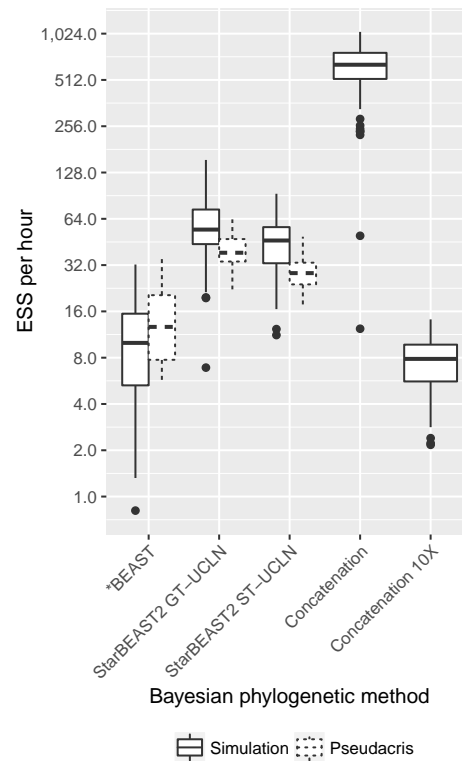

Figure 4: Convergence of different methods applied to simulated and empirical data sets. The estimated sample size (ESS) per hour for a given replicate used the smallest ESS out of all recorded statistics. Methods are BEAST concatenation with 22 loci, concatenation with 220 loci (10X), StarBEAST2 with \*BEAST settings and 22 loci, and StarBEAST2 with high performance settings, 22 loci, and uncorrelated log-normal relaxed clocks applied to the gene trees (GT-UCLN) or to the species tree (ST-UCLN). *Pseudacris* results from Figure 2 are also reproduced for multispecies coalescent analyses (dashed-line boxes).  $N = 96$  (simulated),  $N = 32$  (*Pseudacris*).

using 220 loci (Figure 5A). Pendant edge bias measures systematic bias in the estimated ages of extant species; by that measure StarBEAST2 was much less biased even when concatenation was used with ten-fold more data (Figure 5B). Rooted Robinson-Foulds distance measures the topological accuracy of estimated trees; for that metric concatenation using 22 loci was almost as accurate as StarBEAST2, and more accurate when using 220 loci (Figure 5C). For no type of error did the choice of gene or species tree relaxed clocks significantly

affect the accuracy of StarBEAST2 (Figure 5A,B,C).

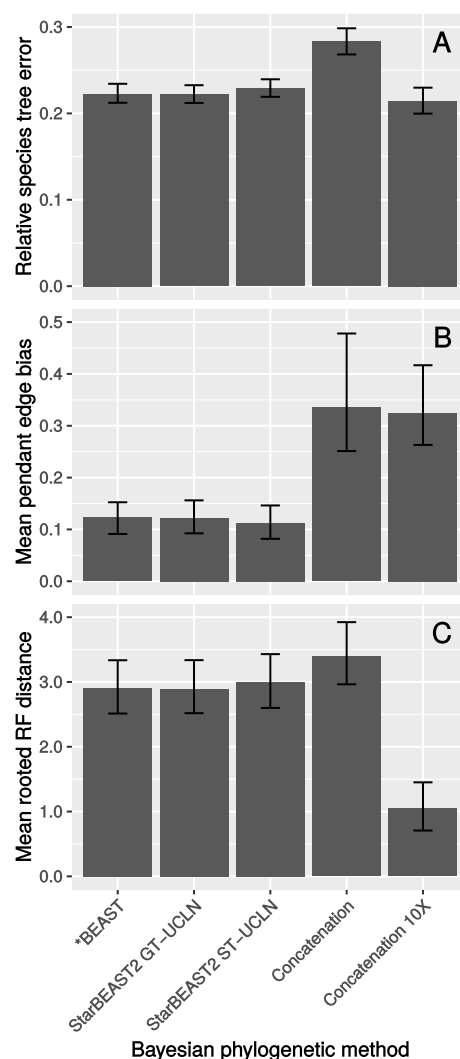

Figure 5: Accuracy of different methods applied to simulated data. Methods are BEAST concatenation with 22 loci, concatenation with 220 loci (10X), StarBEAST2 with \*BEAST settings and 22 loci, and StarBEAST2 with high performance settings, 22 loci, and uncorrelated log-normal relaxed clocks applied to the gene tree (GT-UCLN) or to the species tree (ST-UCLN). (A) Trimmed mean of relative species tree error, a measure of branch length error. (B) Trimmed mean of mean pendant edge bias, which measures biased estimates of the ages of extant species. (C) Trimmed mean of mean rooted Robinson-Foulds (RF) distances, a measure of topological error. 25% trim was used to reduce the influence of outliers. All error bars are 95% confidence intervals calculated by bootstrapping.  $N = 96$ .



### 3.7 StarBEAST2 is superior at inferring substitution rates given intermediate branch lengths

While the convergence of species tree relaxed clock analyses was slower than for gene tree relaxed clocks using high performance settings, species tree relaxed clocks enable inference of species branch rates within an MSC framework. To gauge the accuracy of estimated branch rates, we used simple linear regressions with the true rate of each simulated branch as the explanatory variable, and the posterior expectation of the rate of that branch (conditional on the corresponding clade being monophyletic in the posterior samples) as the response variable. If all estimates are equally proportional to the truth, then the  $R^2$  coefficient of determination will equal 1.

When estimating branch rates using BEAST concatenation with either 22 or 220 loci,  $R^2$  was very weak at 0.07 and 0.09 respectively. By applying a relaxed clock to the species tree using StarBEAST2, the  $R^2$  was much higher at 0.21 using just 22 loci (Figure 6).

The true standard deviation used to simulate branch rates was 0.16, and the estimated standard deviation for 220 locus BEAST concatenation analyses was 0.14. In contrast the estimated standard deviations for 22 locus analyses were 0.08 and 0.07 for concatenation and StarBEAST2 respectively. This is because when the sequence alignments are less informative for a given branch (as happens when fewer loci are used), the posterior expectation of the rate will be close to the prior expectation which is 1. This is evident in Figure 6 as the large number of branch rates around 1 for both 22 locus analyses.

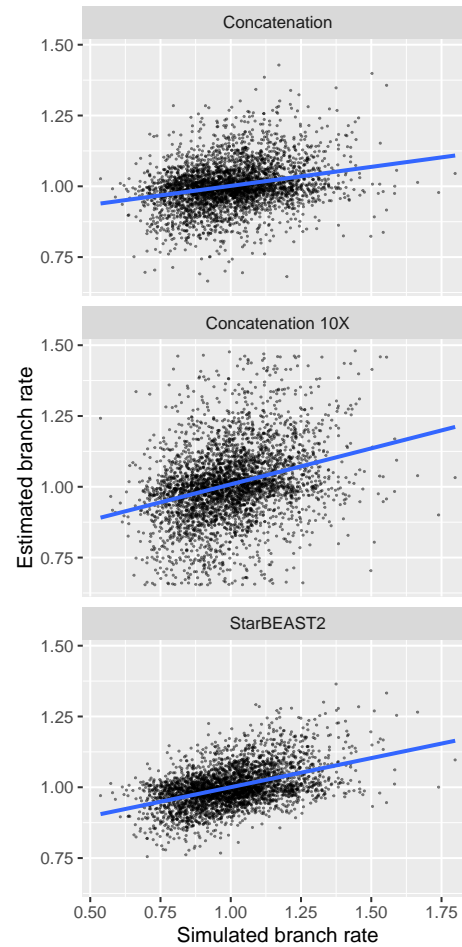

Figure 6: Estimates of species tree branch rates using BEAST concatenation versus StarBEAST2. Methods are concatenation with 22 loci, concatenation with 220 loci (10X), and StarBEAST2 with high performance settings, 22 loci, and a relaxed clock applied to the species tree. Estimated rates are the posterior expectations of each branch rate from each replicate. Root branch rates, which were fixed at 1, were excluded. In blue are simple linear regression lines of best fit.  $N = 96$ .

## 4 Discussion

### 4.1 StarBEAST2 will enable faster and more precise inference

The increased performance of StarBEAST2 will enable researchers to analyze sequence data more quickly and disseminate their findings sooner; a large MCMC analysis which would currently take six weeks might now be performed in one or two weeks. In the case of phylogenomic data which has been subsetting for use with \*BEAST, StarBEAST2 can alternatively be used to analyze more data for more precise estimates of species trees and other parameters in the same amount of time as a more limited \*BEAST analysis.

Our results show that convergence rate of different MCMC chains will vary despite an identical StarBEAST2 configuration and data, as variation in ESS per hour exists between replicate *Pseudacris* runs. The higher standard deviation for the log ESS rate of simulation replicates suggests that additional variation comes from the particular data set being analyzed, because each replicate used a different species tree with different genes and sequence alignments. The *Pseudacris* species tree or choice of genes to sample may represent a slower than average data set, as StarBEAST2 was on average 6.2 times faster than \*BEAST across the simulated data sets, compared to 3.1 times faster for *Pseudacris*.

Previous research on the scaling behaviour of \*BEAST has shown that the relationship between the number of loci in a given analysis and the convergence in terms of ESS per hour follows a power law based on the the number of loci with a coefficient of approximately  $-2.8$

(Ogilvie *et al.*, 2016). If the number of loci for a given analysis is doubled, the convergence rate is therefore expected to be  $\exp(-2.8 \cdot \ln(2)) = 0.144 \approx 1/7$  that of the original analysis. Based on our simulation results, this suggests that StarBEAST2 should be able to analyze datasets of approximately twice the size that \*BEAST can in the same time.

## 4.2 Concatenation can still be inferior given intermediate branch lengths

Likelihood-based or neighbor-joining concatenation cannot accurately estimate branch lengths in substitutions when branches have short lengths in coalescent units. \*BEAST using just four loci can be more accurate than concatenation using 4096 loci in terms of relative species tree error and pendant edge bias. \*BEAST can also be more accurate at estimating species tree topologies given the same number of loci as concatenation, but inferior when concatenation can be used with a much greater number of loci (Ogilvie *et al.*, 2016).

We have shown that concatenation can still be inferior to \*BEAST and StarBEAST2 given intermediate branch lengths. For the same number of loci, a higher relative species tree error indicates that concatenation is less accurate at estimating branch lengths, and a large pendant edge bias indicates that it also tends to overestimate tip branch lengths — equivalent to the ages of extant species given complete species sampling. Unlike the short branch length case, concatenation with 10 times more loci can match the multispecies coalescent in terms of relative species tree error, but is then slower than StarBEAST2 with

high performance settings. In other words, for intermediate branch lengths StarBEAST2 can be just as accurate as concatenation but needs less investment in both sequencing and computational time.

Concatenation does not perform as well as StarBEAST2 in terms of pendant edge bias even using ten-fold as much data. Pendant edge bias is important because many published phylogenies show evidence of a slowdown in diversification rate (Moen and Morlon, 2014). If the ages of extant species are overestimated, this will artificially reduce the number of recent speciation events, mimicking a slowdown. We suggest that accurate inference of changing diversification rates requires species trees inferred by fully Bayesian MSC methods like StarBEAST2.

### **4.3 The multispecies coalescent should be used to infer per-species substitution rates**

Concatenation is already known to have difficulty inferring branch lengths because of SPILS. When a gene tree contains a branch absent from the species tree, substitutions along that branch must be attributed to multiple species tree branches in a concatenation analysis, lengthening those branch estimates. Conversely, when a species tree contains a branch absent from a gene tree, no substitutions can be attributed to that branch, which will be inferred to be shorter (Mendes and Hahn, 2016). We show that by using BEAST concatenation with a relaxed clock, the estimated substitution rate of branches lengthened by SPILS can be

increased, and estimated substitution rate of other branches can be decreased. This causes erroneous results when asking if substitution rates are constant across a species tree. In contrast, StarBEAST2 is resistant to SPILS and did not produce any biased estimates.

When given intermediate branch lengths, concatenation was unable to accurately estimate per-species substitution rates even when using 220 loci, and it is reasonable to assume that shorter coalescent branch lengths would exacerbate the problem. StarBEAST2 can recover many branch rates, and given a more informative data set than our simulation study of  $22 \times 400$ nt loci should be able to further improve the accuracy of estimated rates to a point. There are intrinsic limits to our ability to estimate substitution rates, primarily that branch length is confounded with substitution rate (Thorne and Kishino, 2002).

## 5 Conclusions

When estimating dates and rates, the choice is often between using a subset of available loci with a fully Bayesian MSC method, or all available loci with concatenation. Researchers have often opted for the second choice, but we have shown that concatenation may not accurately estimate the ages of extant species or per-species substitution rates, even for trees of intermediate branch lengths. The increased performance of StarBEAST2 should further encourage the adoption of fully Bayesian MSC methods for estimating divergence times, and the new species tree relaxed clock will enable accurate inference of species branch rates despite ILS. StarBEAST2 is free and open source software, and its source code and development

history is available through GitHub (<https://github.com/genomescale/starbeast2>).

## 6 Materials and Methods

For all StarBEAST2 and BEAST concatenation analyses, the version of BEAST used was 2.4.1. For all simulations, the version of biopy (Heled, 2013) used was 0.1.9.

### 6.1 Mathematical correctness of StarBEAST2

Simulated trees were generated using biopy, and trees sampled from a prior distribution were generated using StarBEAST2 with all new features enabled. This included analytical integration of population sizes, coordinated tree topology and node height changing operators, and a species tree relaxed clock. 100,000 species trees were simulated, and 100,000 trees were sampled from the prior at a rate of one every 1000 after a 10% burn-in period.

Identical parameters were used for the simulation and for the StarBEAST2 run including the prior distributions. The number of species and haplotypes were fixed at 5 and 1 respectively. The birth and death rates were fixed at 200 and 100 respectively. Haploid population sizes followed an inverse gamma distribution with shape  $\alpha = 3$  and scale  $\beta = 0.004$ . Two gene trees were sampled within each species tree with mean clock rates of 0.5 and 2.

This procedure was repeated for both UCLN and for UCED species branch rates. Branch

rates were sampled from a lognormal or exponential distribution, in either case with a mean of 1, discretized into 100 bins. The standard deviation of the UCLN distribution was 0.16.

## 6.2 Preprocessing of *Pseudacris* sequence data

Phased and aligned *Pseudacris* sequence data was retrieved from Dryad (<http://dx.doi.org/10.5061/dryad.23rc0>). In the original analysis, the HKY nucleotide substitution model was applied to 22 out of 26 nuclear loci (Barrow *et al.*, 2014). To simplify our reanalysis, which was focused on performance and not reconstructing the species tree *per se*, we used only those 22 loci. To rank individual sampled frogs by sequence quality, we counted the number of unambiguous base calls for both haplotypes across all 22 HKY loci. To further avoid wasting computational resources, we then reduced the sequence data to both haplotypes from the best-sequenced individual from each of the 19 extant in-group lineages in Barrow *et al.* (2014).

## 6.3 StarBEAST2 reanalysis of *Pseudacris* sequence data

For inference of *Pseudacris* trees, we ran 32 independent StarBEAST2 chains for all 16 conditions for a total of 512 chains. The conditions were each possible combination of species or gene tree relaxed clocks, analytical or MCMC population size integration, coordinated or naïve topology changing operators, and the inclusion or exclusion of coordinated height changing operators. Each chain used the same sequence data but was an independent



estimate of convergence because a different random seed was used to initialize each chain.

A birth-death prior was used for the species tree and both the net diversification and extinction fraction hyperparameters were estimated. An inverse gamma prior was used for per-branch constant population sizes with a shape fixed at 3 and the mean population size hyperparameter was estimated. Relative per-locus clock rates were estimated using a log-normal prior distribution with the mean fixed at 1 in real space and the standard deviation hyperparameter was estimated. An HKY+ $\Gamma$  substitution model with four gamma rate categories was applied to all loci and all base frequencies were estimated separately for each locus. The HKY transition/transversion bias  $\kappa$  and gamma shape parameters were estimated and shared across all loci. The standard deviation of the UCLN clock model was fixed at 0.16 and 0.32 for species tree and gene tree relaxed clocks respectively, and 100 rate categories were used for both types of relaxed clocks.

To ensure convergence of all chains, we ran each chain for an initial length of  $2^{23}$  states, sampling every  $2^{10}$  states. ESS values were computed for all recorded statistics after discarding 12.5% of state samples as burn-in. Recorded statistics included (1) the posterior probability, (2) the coalescent probabilities of gene trees, (3) the overall prior probability, (4) the birth death prior probability of the species tree, (5) the phylogenetic likelihood, (6) the net diversification rate, (7) the extinction fraction, (8) the HKY  $\kappa$  parameter, (9) the among-site rate variation  $\alpha$  parameter, (10) the standard deviation of per-locus clock rates, (11) the mean population size, (12) the height of the species tree, and (13) the length of the species tree.

If any recorded statistic had an ESS below 200, the chain was resumed until the length of the chain was doubled. ESS values were then re-evaluated, again after discarding 12.5% of state samples. The length of the chain was continually doubled and ESS values re-evaluated until the ESS values of all recorded statistics were above 200. The rate at which trees and statistics were sampled was halved with every chain doubling so that the total number of samples remained constant.

ESS per hour was calculated by dividing the final ESS value for a given statistic by 87.5% of the total CPU time used by that chain to account for burn-in. Likewise ESS per million states was calculated by dividing the final ESS value by 87.5% of the total number of the states in the chain, then multiplied by one million. For all analyses of computational performance including graphs and linear models, the ESS rate for any given chain was that of the slowest converging statistic for that particular chain.

Average branch length in coalescent units was calculated by concatenating the output (after discarding the first 12.5% of states as burn-in from each chain) of all 32 chains which used the combination of MCMC population size integration, naïve topology operators, coordinated node height operators and species tree branch rates. For every sample in the combined posterior distribution, the coalescent length of each branch  $\tau/2N_e$  was calculated from its length in substitution units  $\tau$  and its effective population size  $N_e$ . The mean coalescent length of all branches across all samples was taken as the average.

## 6.4 Testing the effects of SPILS on estimated substitution rates

To test how SPILS affected estimates of per-species branch substitution rates, 96 fully asymmetric species trees were simulated with the topology (((((A,B),C),D),E). All species trees were simulated according to a pure birth Yule process (Yule, 1925) with a speciation rate of 10.

Haploid population sizes for each branch were chosen independently from an inverse gamma distribution with a shape of 3 and a scale of 0.2. 100 gene trees with one individual per extant species were then simulated for each species tree according to the MSC process using biopy. Finally 1000nt sequence alignments were then simulated for each gene tree according to the Jukes-Cantor substitution model (Jukes and Cantor, 1969), equal base frequencies, no among-site rate variation, a strict molecular clock, and a substitution rate of 1 for each locus. Sequence alignments were simulated using Seq-Gen (Rambaut and Grass, 1997).

BEAST concatenation and StarBEAST2 were then used to estimate the branch rates and divergence times with the species tree topology fixed to the truth. The same substitution model used for simulating sequences (i.e. Jukes-Cantor, no rate variation among sites or loci) was also used for inference. UCLN relaxed clocks were applied to the tree inferred by concatenation and to the StarBEAST2 species tree.

A slightly modified strategy to ensure convergence was used compared to *Pseudacris* analyses. HKY  $\kappa$ , among-site rate variation  $\alpha$ , and per-locus clock rates were not estimated

so those parameters were not recorded. Likewise for concatenation analyses mean population sizes and coalescent probabilities were not recorded. For StarBEAST2 the initial chain length was  $2^{24}$  states, sampling every  $2^{11}$  states. For concatenation the initial chain length was  $2^{22}$  states, sampling every  $2^9$  states.

For every converged chain, the posterior expectation and 95% credibility intervals of per-species branch rates were calculated using the TreeAnnotator program supplied with BEAST.

## 6.5 Simulations to measure computational performance and statistical accuracy

All simulation parameters were chosen to be broadly similar to those observed in or estimated from the *Pseudacris* data set.

First, 96 species trees were simulated according to a birth-death process (Gernhard, 2008) using biopy with 19 extant species, a speciation rate of 160 and a death rate of 80. This corresponds to a net diversification rate of 80 and an extinction fraction of 0.5. Haploid population sizes for each branch were chosen independently from an inverse gamma distribution with a shape of 3 and a scale of 0.004. For a species with annual generation times, as is the case for at least some *Pseudacris* species (Caldwell, 1987), this corresponds to an effective population size of around 1000 individuals per generation. Species branch rates were chosen from a log-normal distribution with a mean in real space of 1 and a standard

deviation of 0.16, then scaled so that the mean of the branch rates for a given species tree was exactly 1. This ensured that per-branch rates always reflected relative differences in substitution rates.

For each species tree, 220 gene trees with two sampled haplotype sequences per species were simulated according to the MSC process using biopy. The mean clock rate for each locus was chosen from a log-normal distribution with a mean in real space of 1 and a standard deviation of 0.3.

For each gene tree, 400nt long sequence alignments were simulated using Seq-Gen (Rambaut and Grass, 1997). An HKY model was used for all sequence alignments with equal base frequencies, a  $\kappa$  value of 3, and a four rate category discretized gamma model of among-site rate variation with a shape  $\alpha$  value of 0.2 (Yang, 1994).

## 6.6 Performance and accuracy of StarBEAST2 and concatenation

The five methods of inference used for this section were concatenation with 22 loci, concatenation with 220 loci, StarBEAST2 with \*BEAST settings, StarBEAST2 with high performance settings and gene tree relaxed clocks, and StarBEAST2 with high performance settings and species tree relaxed clocks. A single MCMC chain was run for each method of inference for all 96 replicates, a total of 480 chains.

The settings used for StarBEAST2 analyses of simulated sequence data were identical

to the analysis of *Pseudacris* sequence data. Concatenation used the same settings as StarBEAST2, but instead of inferring each gene tree within a species tree, a single concatenated tree was inferred using the likelihoods of all loci. In addition to the rates of concatenated tree branches, we estimated the per-locus rates in the same way as for StarBEAST2, a model equivalent to that described by Rasmussen and Kellis (2007). Heterozygous sites were ambiguity coded for concatenation analyses.

Again a slightly modified strategy to ensure convergence was used compared to *Pseudacris* analyses. Mean population sizes and coalescent probabilities are not estimated and hence were not recorded for concatenation analyses. The initial chain length for concatenation was  $2^{20}$  states, sampling every  $2^7$  states. ESS per hour and ESS per million states were calculated in the same way as for *Pseudacris*.

Relative species tree error is based on “rooted branch score” (RBS; Heled and Bouckaert, 2013). Given two trees  $T_1$  and  $T_2$ , the sets of monophyletic clades  $c$  present in each tree are defined as  $\mathbb{C}_1$  and  $\mathbb{C}_2$ . The length of the parent branch extending from the root of the subtree defined by  $c$  is then  $b(c)$ . To calculate the rooted branch score, sum all absolute differences in  $b(c)$  between trees  $T_1$  and  $T_2$ :

$$RBS(T_1, T_2) = \sum_{c \in \mathbb{C}_1 \cup \mathbb{C}_2} |b^{(1)}(c) - b^{(2)}(c)| \quad (9)$$

If a clade  $c$  is present in only one of  $T_1$  or  $T_2$ , then the branch length  $b(c)$  from the tree

containing  $c$  is added to the RBS. Relative species tree error is the mean RBS between an estimated species tree and the true species tree over the posterior distribution of species trees, and is normalized by dividing by the total length of the true species tree (Ogilvie *et al.*, 2016).

Pendant edge bias is defined as  $\hat{h}-h/h$ , where the estimated age for each extant species is  $\hat{h}$  and the true age is  $h$ . The mean pendant edge bias is the average pendant edge bias for all extant species across all posterior samples.

Rooted Robinson-Foulds distances (Robinson and Foulds, 1981) are defined as the count of clades present only one of  $T_1$  and  $T_2$ . In this study, the mean rooted Robinson-Foulds distance is the average of all distances between each estimated tree and the true tree for all posterior samples.

## 7 Supplementary Material

Supplementary figures S1–S10 and tables S1–S8 will be made available online.

## 8 Acknowledgments

This work was supported by a Rutherford Discovery Fellowship awarded to A.J.D. by the Royal Society of New Zealand. H.A.O. was supported by an Australian Laureate Fel-

lowship awarded to Craig Moritz by the Australian Research Council (FL110100104). This research was undertaken with the assistance of resources from the National Computational Infrastructure (NCI), which is supported by the Australian Government. We wish to thank Jason Bragg and Renee Catullo for testing StarBEAST2 before its official release, Timothy Vaughan for suggesting the addition of a root height changing operator, Joseph Heled for insight into the multispecies coalescent, and Graham Jones for input regarding operator performance. We also thank Tanja Stadler for hosting H.A.O. and A.J.D. during part of the development of StarBEAST2, and Fábio Mendes and Matthew Hahn for discussions around SPILS and suggested improvements to this manuscript.

## References

- Aberer, A. J., Kobert, K., and Stamatakis, A. 2014. ExaBayes: Massively parallel Bayesian tree inference for the whole-genome era. *Molecular Biology and Evolution*, 31(10): 2553–2556.
- Andrieu, C. and Thoms, J. 2008. A tutorial on adaptive MCMC. *Statistics and Computing*, 18(4): 343–373.
- Arbogast, B. S., Edwards, S. V., Wakeley, J., Beerli, P., and Slowinski, J. B. 2002. Estimating divergence times from molecular data on phylogenetic and population genetic timescales. *Annual Review of Ecology and Systematics*, 33(1): 707–740.



- Baer, C. F., Miyamoto, M. M., and Denver, D. R. 2007. Mutation rate variation in multicellular eukaryotes: causes and consequences. *Nature Reviews Genetics*, 8(8): 619–631.
- Barrow, L. N., Ralicki, H. F., Emme, S. A., and Lemmon, E. M. 2014. Species tree estimation of North American chorus frogs (Hylidae: *Pseudacris*) with parallel tagged amplicon sequencing. *Molecular Phylogenetics and Evolution*, 75: 78–90.
- Berv, J. S. and Prum, R. O. 2014. A comprehensive multilocus phylogeny of the Neotropical cotingas (Cotingidae, Aves) with a comparative evolutionary analysis of breeding system and plumage dimorphism and a revised phylogenetic classification. *Molecular Phylogenetics and Evolution*, 81: 120–136.
- Blom, M. P. K., Horner, P., and Moritz, C. 2016. Convergence across a continent: adaptive diversification in a recent radiation of Australian lizards. *Proceedings of the Royal Society of London B: Biological Sciences*, 283(1832).
- Bouckaert, R., Heled, J., Kühnert, D., Vaughan, T., Wu, C.-H., Xie, D., Suchard, M. A., Rambaut, A., and Drummond, A. J. 2014. BEAST 2: A software platform for Bayesian evolutionary analysis. *PLoS Computational Biology*, 10(4): e1003537.
- Bromham, L. 2011. The genome as a life-history character: why rate of molecular evolution varies between mammal species. *Philosophical Transactions of the Royal Society of London B: Biological Sciences*, 366(1577): 2503–2513.
- Caldwell, J. P. 1987. Demography and life history of two species of chorus frogs (Anura: Hylidae) in South Carolina. *Copeia*, 1987(1): 114–127.

- Degnan, J. H. and Rosenberg, N. A. 2006. Discordance of species trees with their most likely gene trees. *PLoS Genetics*, 2(5): e68.
- Degnan, J. H. and Rosenberg, N. A. 2009. Gene tree discordance, phylogenetic inference and the multispecies coalescent. *Trends in Ecology & Evolution*, 24(6): 332–340.
- Drummond, A. J. and Rambaut, A. 2007. BEAST: Bayesian evolutionary analysis by sampling trees. *BMC Evolutionary Biology*, 7: 214.
- Drummond, A. J. and Suchard, M. A. 2010. Bayesian random local clocks, or one rate to rule them all. *BMC Biology*, 8: 114.
- Drummond, A. J., Ho, S. Y. W., Phillips, M. J., and Rambaut, A. 2006. Relaxed phylogenetics and dating with confidence. *PLoS Biology*, 4(5): e88.
- Felsenstein, J. 1981. Evolutionary trees from DNA sequences: A maximum likelihood approach. *Journal of Molecular Evolution*, 17(6): 368–376.
- Gernhard, T. 2008. The conditioned reconstructed process. *Journal of Theoretical Biology*, 253(4): 769–778.
- Goldman, N. 1993. Statistical tests of models of DNA substitution. *Journal of Molecular Evolution*, 36(2): 182–198.
- Gossmann, T. I., Schmid, M. W., Grossniklaus, U., and Schmid, K. J. 2014. Selection-driven evolution of sex-biased genes is consistent with sexual selection in *Arabidopsis thaliana*. *Molecular Biology and Evolution*, 31(3): 574–583.

- Guindon, S., Dufayard, J.-F., Lefort, V., Anisimova, M., Hordijk, W., and Gascuel, O. 2010. New algorithms and methods to estimate maximum-likelihood phylogenies: Assessing the performance of PhyML 3.0. *Systematic Biology*, 59(3): 307–321.
- Hasegawa, M., Kishino, H., and Yano, T. 1985. Dating of the human-ape splitting by a molecular clock of mitochondrial DNA. *Journal of Molecular Evolution*, 22(2): 160–174.
- Hastings, W. K. 1970. Monte Carlo sampling methods using Markov chains and their applications. *Biometrika*, 57(1): 97–109.
- Heled, J. 2013. biopy — a library for phylogenetic exploration. [https://figshare.com/articles/biopy\\_a\\_Library\\_for\\_Phylogenetic\\_Exploration/761224](https://figshare.com/articles/biopy_a_Library_for_Phylogenetic_Exploration/761224).
- Heled, J. and Bouckaert, R. R. 2013. Looking for trees in the forest: summary tree from posterior samples. *BMC Evolutionary Biology*, 13(1): 1–11.
- Heled, J. and Drummond, A. J. 2010. Bayesian inference of species trees from multilocus data. *Molecular Biology and Evolution*, 27(3): 570–580.
- Jones, G. 2016. Algorithmic improvements to species delimitation and phylogeny estimation under the multispecies coalescent. *Journal of Mathematical Biology*. Advance access.
- Jukes, T. H. and Cantor, C. R. 1969. Evolution of protein molecules. In *Mammalian Protein Metabolism*, pages 21–132. Academic Press.
- Kubatko, L. S. and Degnan, J. H. 2007. Inconsistency of phylogenetic estimates from concatenated data under coalescence. *Systematic Biology*, 56(1): 17–24.

- Lambert, S. M., Reeder, T. W., and Wiens, J. J. 2015. When do species-tree and concatenated estimates disagree? An empirical analysis with higher-level scincid lizard phylogeny. *Molecular Phylogenetics and Evolution*, 82, Part A: 146–155.
- Lemmon, E. M. and Lemmon, A. R. 2013. High-throughput genomic data in systematics and phylogenetics. *Annual Review of Ecology, Evolution, and Systematics*, 44(1): 99–121.
- Liu, L. 2008. BEST: Bayesian estimation of species trees under the coalescent model. *Bioinformatics*, 24(21): 2542–2543.
- Liu, L., Pearl, D. K., Brumfield, R. T., and Edwards, S. V. 2008. Estimating species trees using multiple-allele DNA sequence data. *Evolution*, 62(8): 2080–2091.
- Liu, L., Yu, L., and Edwards, S. V. 2010. A maximum pseudo-likelihood approach for estimating species trees under the coalescent model. *BMC Evolutionary Biology*, 10: 302.
- Liu, L., Xi, Z., Wu, S., Davis, C. C., and Edwards, S. V. 2015. Estimating phylogenetic trees from genome-scale data. *Annals of the New York Academy of Sciences*, 1360(1): 36–53.
- Mendes, F. K. and Hahn, M. W. 2016. Gene tree discordance causes apparent substitution rate variation. *Systematic Biology*, 65(4): 711–721.
- Metropolis, N., Rosenbluth, A. W., Rosenbluth, M. N., Teller, A. H., and Teller, E. 1953. Equation of state calculations by fast computing machines. *The Journal of Chemical Physics*, 21(6): 1087–1092.

- Mirarab, S. and Warnow, T. 2015. ASTRAL-II: coalescent-based species tree estimation with many hundreds of taxa and thousands of genes. *Bioinformatics*, 31(12): i44–i52.
- Mirarab, S., Reaz, R., Bayzid, M. S., Zimmermann, T., Swenson, M. S., and Warnow, T. 2014. ASTRAL: genome-scale coalescent-based species tree estimation. *Bioinformatics*, 30(17): i541–i548.
- Moen, D. and Morlon, H. 2014. Why does diversification slow down? *Trends in Ecology & Evolution*, 29(4): 190–197.
- Moritz, C., Dowling, T. E., and Brown, W. M. 1987. Evolution of animal mitochondrial DNA: Relevance for population biology and systematics. *Annual Review of Ecology and Systematics*, 18: 269–292.
- Ogilvie, H. A., Heled, J., Xie, D., and Drummond, A. J. 2016. Computational performance and statistical accuracy of \*BEAST and comparisons with other methods. *Systematic Biology*, 65(3): 381–396.
- Rambaut, A. and Grass, N. C. 1997. Seq-Gen: an application for the Monte Carlo simulation of DNA sequence evolution along phylogenetic trees. *Computer applications in the biosciences*, 13(3): 235–238.
- Rannala, B. and Yang, Z. 2015. Efficient Bayesian species tree inference under the multi-species coalescent. *ArXiv e-prints*.
- Rasmussen, M. D. and Kellis, M. 2007. Accurate gene-tree reconstruction by learning gene-

- and species-specific substitution rates across multiple complete genomes. *Genome Research*, 17(12): 1932–1942.
- Robinson, D. and Foulds, L. 1981. Comparison of phylogenetic trees. *Mathematical Biosciences*, 53(1–2): 131–147.
- Stamatakis, A. 2014. RAxML version 8: a tool for phylogenetic analysis and post-analysis of large phylogenies. *Bioinformatics*, 30(9): 1312–1313.
- Thorne, J. L. and Kishino, H. 2002. Divergence time and evolutionary rate estimation with multilocus data. *Systematic Biology*, 51(5): 689–702.
- Xi, Z., Liu, L., and Davis, C. C. 2015. Genes with minimal phylogenetic information are problematic for coalescent analyses when gene tree estimation is biased. *Molecular Phylogenetics and Evolution*, 92: 63–71.
- Yang, Z. 1994. Maximum likelihood phylogenetic estimation from DNA sequences with variable rates over sites: Approximate methods. *Journal of Molecular Evolution*, 39(3): 306–314.
- Yang, Z. 2007. PAML 4: Phylogenetic analysis by maximum likelihood. *Molecular Biology and Evolution*, 24(8): 1586–1591.
- Yang, Z. 2015. The BPP program for species tree estimation and species delimitation. *Current Zoology*, 61(5): 854–865.

Yang, Z. and Rannala, B. 2014. Unguided species delimitation using DNA sequence data from multiple loci. *Molecular Biology and Evolution*, 31(12): 3125–3135.

Yule, G. U. 1925. A mathematical theory of evolution, based on the conclusions of Dr. J. C. Willis, F.R.S. *Philosophical Transactions of the Royal Society B: Biological Sciences*, 213(402-410): 21–87.
